# Supplementary material for: Patient genetics shape the autoimmune response in the blistering skin disease pemphigus vulgaris
Source: PubMed Central journal article supplement (PMC9871500; doi:10.3389/fimmu.2022.1064073), 2023-01-10

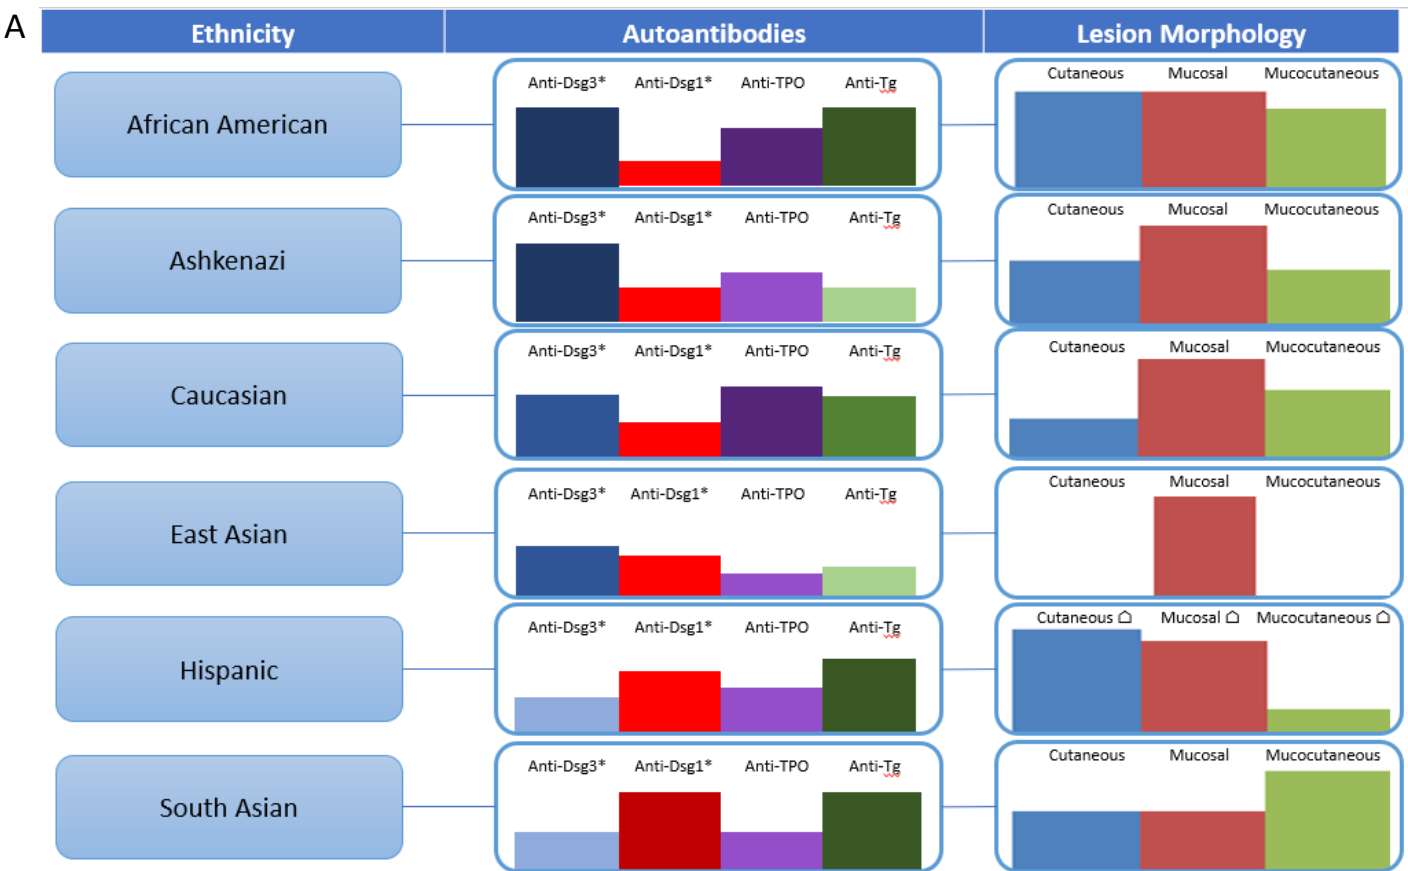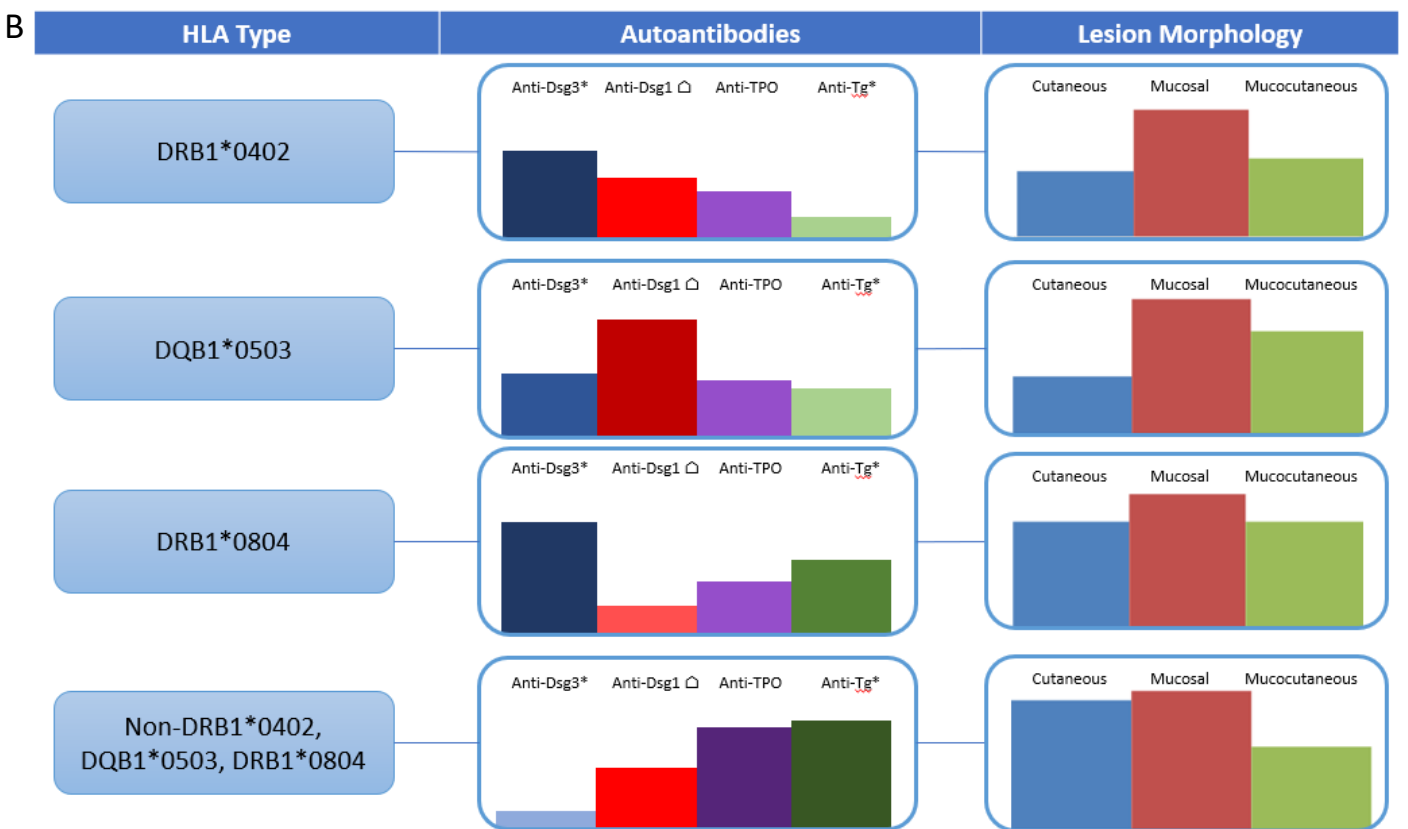

Supplement: Image_2.pdf [file Image_2.pdf]
